# Supplementary material for: Inhibition of MicroRNA 6937 Delays Photoreceptor and Vision Loss in a Mouse Model of Retinitis Pigmentosa
Source: PubMed Central journal article supplement (PMC7598722; doi:10.3390/pharmaceutics12100913), 2020-09-24
Supplement: pharmaceutics-12-00913-s001.pdf [file pharmaceutics-12-00913-s001.pdf]

## Supplementary Materials: Inhibition of MicroRNA 6937 Delays Photoreceptor and Vision Loss in a Mouse Model of Retinitis Pigmentosa

Ander Anasagasti, Araceli Lara-López, Santiago Milla-Navarro, Leire Escudero-Arrarás, María Rodríguez-Hidalgo, Nerea Zabaleta, Gloria González Aseguiñolaza, Pedro de la Villa, Javier Ruiz-Ederra.

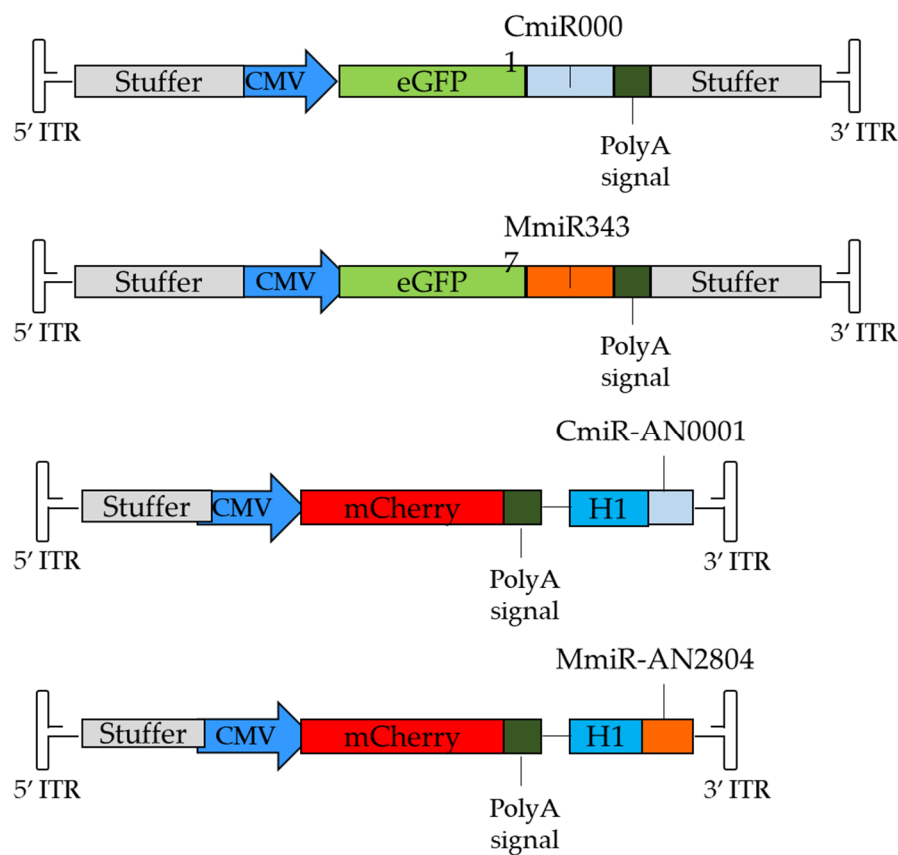

**Figure S1.** Maps of the constructs employed for miRNA modulation. Pre-miRNAs expressed green fluorescence reporter (eGFP, top), whereas anti-miRNA expressed red fluorescence reporter (mCherry), under the same promoter (CMV). Constructs of scramble sequences for both pre- and anti-miRNAs (controls) is also shown.

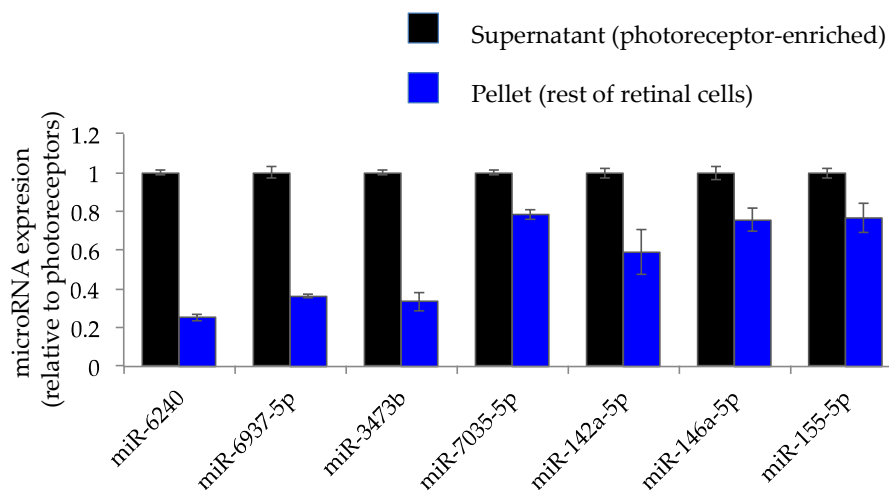

**Figure S2.** Levels of expression of a selected group of microRNAs within rd10 mice retina. Expression levels of non-photoreceptor retinal cells, in blue, are normalized to isolated photoreceptors, in black. Data is represented as mean values  $\pm$  SEM.

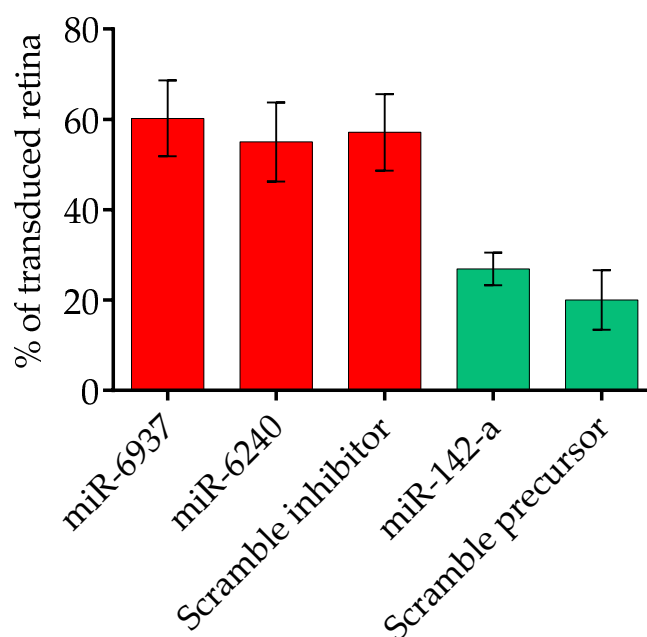

**Figure S3.** Percentage of mice retinal area transduced with AAV vectors after subretinal injection. AAVs expressing inhibitory miR sequences included mCherry reporter, and are represented as red bars. We were able to transfect up to 60% of retinal area. AAVs expressing precursor miR sequences included GFP reporter, and are represented as green bars. Only 20–30% of retinal area was successfully transfected using miR precursors. Data is represented as mean values  $\pm$  SEM.

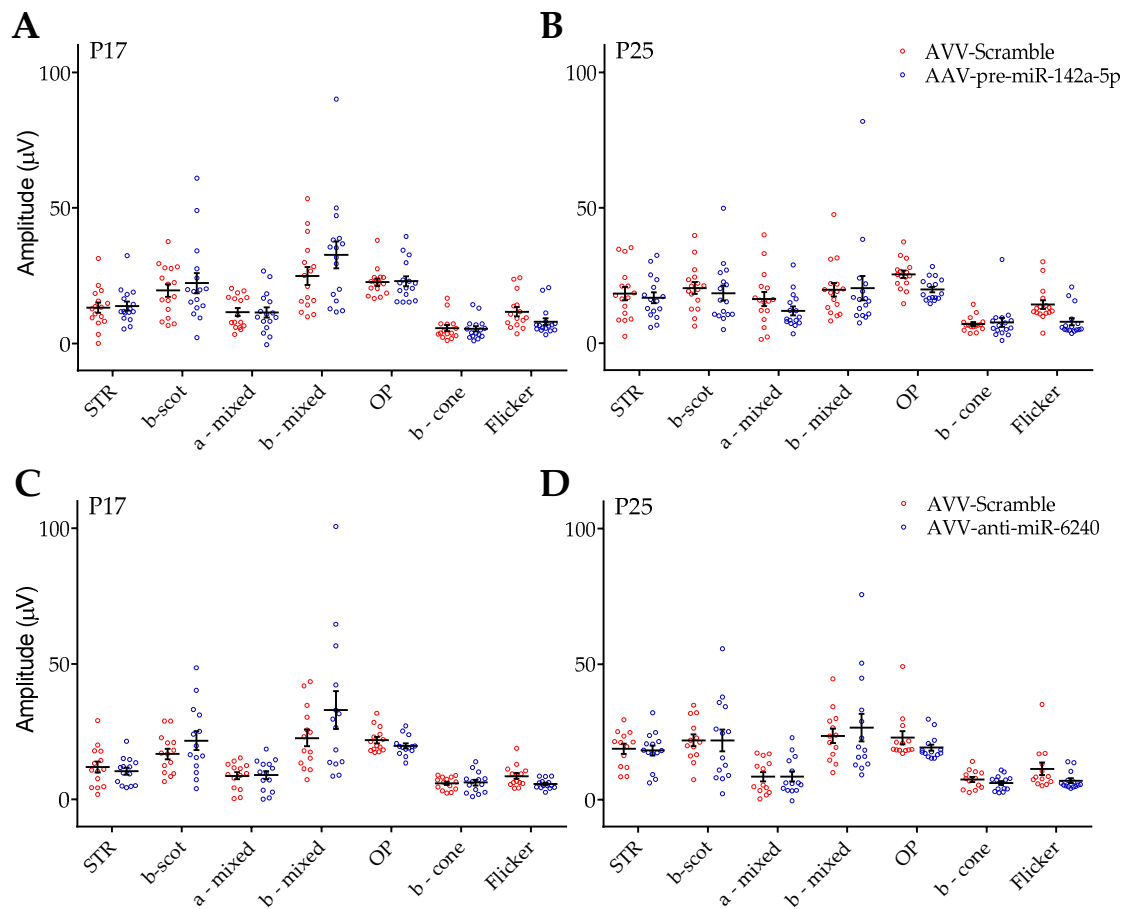

**Figure S4.** Representative histograms of different ERG parameters analyzed after subretinal injection with AAVs expressing miR-142a-5p precursors (A-B) and miR-6240 inhibitors (C-D). No differences with respect controls were observed in any parameter analyzed neither at P17 nor at P22.  $N = 15$  mice per treatment. Abbreviations: STR: Scotopic threshold response; scot: scotopic; OP: Oscillatory Potentials. . Data is represented as mean values  $\pm$  SEM.

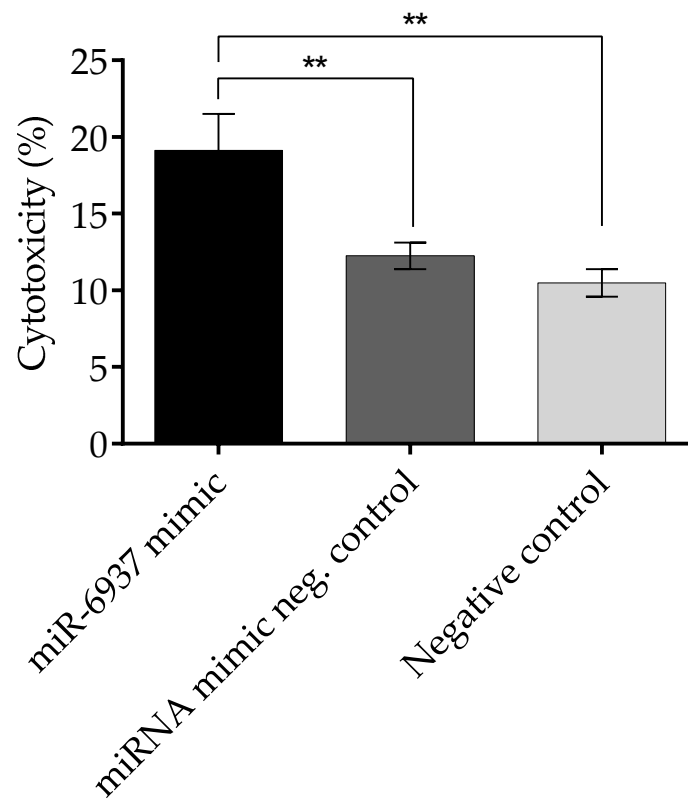

**Figure S5.** Cytotoxicity of MU-PH1 cell line treated with miR-6937-5p mimics. An increased cytotoxicity is associated with miR-6937-5p expression.  $N = 6$  plates/condition in 3 independent experiments. Data is represented as mean values  $\pm$  SEM (\*\* $p < 0.005$ , student's t-test).

**Table S1.** List of validated mRNAs analyzed by qPCR with primer sequences.

| mRNA ID   | Forward Primer                     | Reverse Primer                      |
|-----------|------------------------------------|-------------------------------------|
| Arhgap18  | AGACA ACTTCGTTTTCGGTCAGTCT         | ACCAACTCAGCTCCCTCTGTGTAGT           |
| Cngb1     | CTGGAGAGGCATGCAGAAGGT              | GGATCTGTGCTCCACCCTGAT               |
| Crx       | TCCAGGGTCCAGGTCTGGTT               | CTGTTGCTGTTTCTGCTGCTGT              |
| Cryaa     | GCCCTTCCTGTCTTCCACCAT              | CCACATATGGGTCATGAGCTCAGA            |
| Cth       | GCTTCGTTTCCTGCAGAATTCATA           | CATCCGGACCTGCAGTGTCTT               |
| Cxcr4     | GCCATGGAACCGATCAGTGTGAGTATA        | ACGTTTTTCATCCCGGAAGCA               |
| Doc2b     | GGACCACAATGGACTGGCTGAT             | TTGTTCTGAGCTTATTTGCCTTGCT           |
| Dpys15    | GAAGCTGGTACAGAGAGAGAAGACCTT<br>AA  | GGTGGACAACAATGGCGACAT               |
| Duxbl2    | CTCTCGAGTCTCAAATTATGACTTGGTTT      | TCTAGGTTTATCCTGCTCCTGCTCTT          |
| E2f3      | CCAAGCCCACTTCCAAAGACTT             | GGATTTGGTCCCTCAGTCTGCTGTA           |
| Eif2s3y   | CAGGTGGTCTTATTGGAGTTGGA            | TCTAACTCTGTGAATATCTCAGGTAATGC<br>T  |
| Fabp7     | CACAATGCACATTCAAGAACACAGA          | ATCCAACCGAACCACAGACTTACA            |
| Klhl23    | GACCGTAGTTTCGCCTTCTTCTCT           | TGTCCTTTTAGAGCCATGCTTCTCT           |
| Lca5      | AAGTGCATCACCCAACCGTTA              | ATCTTTCCGAAGTGGCTCTCTGT             |
| Map2k6    | TGTCTGTTATCCATCGAGACGTCAA          | AGAGTCGACCAGGTAGCCACTGAT            |
| Mllt11    | TGAGGCATCCCTTCCGTCTT               | GGTCCCTCATGATCCCCTGTTA              |
| Mtch1     | CTGCTGATCCAGGTGGGTCAT              | AGGTGAAGAAGCTCGGCAGGTA              |
| Mtfp1     | CAAATGGACCACCACCACACTT             | AGGAAGTCCACTGACCTGTGAT              |
| Nnat      | GTGCTGCTGCAGGTGTTCTT               | GGCTGTGTCCCTGGAGGATT                |
| Nr2e3     | CAGGTGATGCTAAGCCAGCAT              | GAGCAATTTCCCAAACCTCACA              |
| Nxn12     | GACCCCTACCGGCATGAACT               | TGACAGCTCCGTTCTGCTTGA               |
| Osmr      | CCAGACACAAAGTACAAGGCTTTTGT         | AGAGCCTGTGAGGGAGCAGTCT              |
| Otud7b    | CCATGACCCTGGACATGGAT               | ACTCACATCCCAGTTCTTTCCTTCT           |
| Pak3      | TGCTAAGGAGCTTTTGCAGCAT             | CGGCTACTGTTCTTAATTGCTTCT            |
| Pan2      | GCTATCATCTCCAGTCAGGTCAAT           | CACATCAAACGTCATTAGCAAAGGT           |
| Pde6g     | AGCGGCAAACAAGGCAGTT                | TGCAAGGGTTTGGGGATGA                 |
| Peli3     | CCAGGTGTCTGGAGGGAGATT              | GGATTCGTTTTCCACCAGCTT               |
| Pla2r1    | CCACCACAAGCCGATACGAA               | TCACAGAACACCTTCATAGAGGTAGGAT        |
| Prdm1     | CTGAAGAAACAGAATGGCAAGATCAA         | TGCACTCTCAGGTGGACCTTCA              |
| Psd2      | GAGTTCAGCAGGCTGGTTGCT              | GGCCTTCAGGAAGGTTCTGAGT              |
| Ptn       | CAGACCATGAAAGACTCAGAGATGTAA<br>GAT | ACTGGTACTTGCCTCAGCTCCAA             |
| Rdh12     | ACAGCTCCATCCATCAGGAAGTT            | TCTGGCTGTCTCCTTGCCAAT               |
| Rdh8      | GGACAAGTGGATGTGCTAGTGAACA          | TGCATGGTGGCTAGGCTGAGT               |
| Rgr       | TGACTATGAGCCTGTGGGGACAT            | TGAAGAGAAAAGTATGAAGTTTCTGTC<br>A    |
| Rraga     | CATCTGGGATGAGACGCTCTACA            | CTGGGCAAATTCCTTAGGTTCA              |
| Rs1       | GATCTTGCTGTGACCAAGGACAA            | GACAATCCCAATGTGGCTTCA               |
| Sema7a    | CCATCCGGAAGCAGGAATACA              | TTGATGAAGTGTGGGTTCTGCAT             |
| Serpina3n | CTGGAGGATGTCTTTCAAAGCT             | GCCTTGTGGACCACCTGAGA                |
| Sgk1      | GACTACATTAATGGTGGAGAGCTGTTCT<br>A  | GCTATTTAGCTGCGTAGAATCGA             |
| Tdrd7     | ACCGTCTGTGTTGGTGGTTGA              | AGCTGAGTAGTCTTTGCCTACATACCTGA<br>TA |

**Table S2.** Expression levels of those differentially expressed mRNAs after in vivo miR-6937-5p modulation and their associated biological pathways. Abbreviations: SC: scramble miR; C: control (sham injection). (\*) indicates predicted target mRNAs for miRA6937A5p.

| Gene Symbol   | Fold-change |           |          | Pathways                                                                                     |
|---------------|-------------|-----------|----------|----------------------------------------------------------------------------------------------|
|               | 937 vs SC   | 6937 vs C | SC vs. C |                                                                                              |
| * Angptl1     | 1.5         | 1.67      | -1.12    | Akt signaling / Transmembrane receptor protein tyrosine kinase signaling pathway             |
| * Bcl2a1d     | 1.6         | 1.5       | 1.22     | Negative regulation of apoptotic process / T cell receptor signaling pathway                 |
| * Exosc6      | 1.62        | 1.58      | 1.02     | Negative regulation of neuron apoptotic process / rRNA processing                            |
| Ntng2         | 2.31        | 1.69      | 1.36     | Nervous system development / axonogenesis / cell differentiation                             |
| Cpne8         | 2.25        | 1.78      | 1.26     | Calcium-dependent membrane-binding                                                           |
| Cryba1        | 2.16        | 2.14      | 1.01     | Visual perception / camera-type eye development / lens development in camera-type eye        |
| 1600002K03Rik | 2.1         | 1.73      | 1.22     | ---                                                                                          |
| Atxn2l        | 2.06        | 1.78      | 1.16     | Regulation of cytoplasmic mRNA processing body assembly / stress granule assembly            |
| Cldn5         | 2.03        | 2.39      | -1.18    | Single organismal cell-cell adhesion / myelination / calcium-independent cell-cell adhesion  |
| Cog2          | 2.01        | 1.78      | 1.13     | Protein transport // intra-Golgi vesicle-mediated transport                                  |
| Mapk1         | 2           | 1.65      | 1.21     | Apoptotic process / cellular response to DNA damage stimulus                                 |
| Lmln          | 1.98        | 1.57      | 1.26     | Proteolysis / cell cycle / mitotic nuclear division                                          |
| Tle2          | 1.93        | 1.68      | 1.15     | Regulation of transcription. DNA-templated / Wnt signaling pathway                           |
| Fancc         | 1.92        | 1.59      | 1.2      | Myeloid cell homeostasis / DNA repair / cellular response to DNA damage stimulus             |
| Ipo9          | 1.91        | 1.51      | 1.26     | Protein import into nucleus / ribosomal protein import into nucleus / transport              |
| Hnrnp3        | 1.9         | 1.54      | 1.24     | Nucleic acid binding / RNA binding                                                           |
| Tmem242       | 1.9         | 1.71      | 1.11     | Transmembrane Protein                                                                        |
| Defb110       | 1.89        | 1.8       | 1.05     | Innate Immune System / Defense response                                                      |
| Defb41        | 1.89        | 1.8       | 1.05     | ---                                                                                          |
| Csnk1g2       | 1.87        | 1.71      | 1.1      | Protein phosphorylation / Wnt signaling pathway                                              |
| Gm2027        | 1.87        | 1.52      | 1.23     | ---                                                                                          |
| Pnpla8        | 1.87        | 1.52      | 1.23     | Cell death / lipid metabolic process / fatty acid metabolic process                          |
| Tmem182a      | 1.85        | 1.5       | 1.23     | Toxic substance binding / pathogenesis                                                       |
| Blvra         | 1.83        | 1.69      | 1.08     | Heme catabolic process / oxidation-reduction process                                         |
| Slc6a9        | 1.83        | 1.75      | 1.04     | Neurotransmitter transport / amino acid transport / glycine transport /                      |
| Clip1         | 1.81        | 1.66      | 1.09     | Transport / positive regulation of microtubule polymerization / microtubule bundle formation |
| Ipo13         | 1.79        | 2.18      | -1.22    | Protein import into nucleus / transport / intracellular protein transport                    |
| Dot1l         | 1.79        | 1.68      | 1.07     | Chromatin modification / histone methylation / peptidyl-lysine methylation                   |
| Ckmt2         | 1.77        | 1.55      | 1.14     | Phosphocreatine metabolic process / phosphorylation                                          |
| Spc25         | 1.76        | 1.91      | -1.08    | Cell cycle / chromosome segregation / mitotic nuclear division                               |
| Tma16         | 1.76        | 1.6       | 1.1      | Biological process                                                                           |
| Heatr5a       | 1.76        | 1.78      | -1.01    | Binding                                                                                      |
| Sars          | 1.75        | 1.88      | -1.08    | Translation / tRNA aminoacylation for protein translation / seryl-tRNA aminoacylation        |

|             |      |      |       |                                                                                                       |
|-------------|------|------|-------|-------------------------------------------------------------------------------------------------------|
| Slc7a8      | 1.73 | 1.72 | 1     | Amino acid transmembrane transport / peptide antigen binding                                          |
| Slc7a5      | 1.71 | 1.5  | 1.14  | Amino acid transmembrane transport / transport                                                        |
| Nt5c2       | 1.71 | 1.52 | 1.12  | IMP metabolic process / adenosine metabolic process                                                   |
| Scfd1       | 1.7  | 1.71 | -1.01 | Retrograde vesicle-mediated transport. Golgi to ER / vesicle docking involved in exocytosis           |
| Syf2        | 1.67 | 2.01 | -1.21 | mRNA processing / mitotic G2 DNA damage checkpoint / RNA splicing                                     |
| Frm4b       | 1.67 | 1.86 | -1.11 | Establishment of epithelial cell polarity                                                             |
| Jmy         | 1.67 | 2.37 | -1.42 | Regulation of apoptotic process / intrinsic apoptotic signaling pathway by p53 class mediator         |
| Crygc       | 1.66 | 1.5  | 1.18  | Eye development / visual perception / camera-type eye development                                     |
| Rps6ka5     | 1.66 | 1.96 | -1.18 | Regulation of transcription. DNA-templated                                                            |
| G6pc3       | 1.65 | 1.57 | 1.05  | Gluconeogenesis / phosphate-containing compound metabolic process                                     |
| Slc6a8      | 1.64 | 1.61 | 1.02  | Transport / ion transport / sodium ion transport / neurotransmitter transport                         |
| Mettl16     | 1.64 | 1.95 | -1.18 | Methylation                                                                                           |
| U2af1       | 1.64 | 1.6  | 1.03  | mRNA processing / RNA splicing                                                                        |
| Tspan31     | 1.63 | 2.09 | -1.29 | Regulation of cell development. Activation. growth and motility                                       |
| Tmem181b-ps | 1.63 | 1.82 | -1.12 | pathogenesis                                                                                          |
| Tmem181a    | 1.63 | 1.82 | -1.12 | pathogenesis                                                                                          |
| Aars        | 1.62 | 1.58 | 1.02  | tRNA Aminoacylation                                                                                   |
| Atp2c1      | 1.62 | 1.86 | -1.14 | Cellular calcium ion homeostasis / signal transduction / ATP catabolic process / transport            |
| Ankrd60     | 1.61 | 1.5  | 1.08  | ---                                                                                                   |
| Pfdn2       | 1.59 | 1.58 | 1     | Protein folding                                                                                       |
| Tm4sf1      | 1.59 | 1.84 | -1.16 | ---                                                                                                   |
| Slc25a44    | 1.59 | 1.78 | -1.12 | Transport / transmembrane transport                                                                   |
| Afg3l1      | 1.59 | 1.57 | 1.01  | Proteolysis / mitochondrial protein processing                                                        |
| Gucy2f      | 1.59 | 1.95 | -1.22 | Visual perception / cGMP biosynthetic process / phototransduction                                     |
| R3hdm4      | 1.59 | 1.53 | 1.04  | nucleic acid binding                                                                                  |
| Dcaf12      | 1.58 | 1.83 | -1.15 | Protein ubiquitination                                                                                |
| Ireb2       | 1.58 | 1.79 | -1.14 | Regulation of translation / cellular iron ion homeostasis                                             |
| Gm10477     | 1.58 | 1.77 | -1.12 | ---                                                                                                   |
| Thg1l       | 1.58 | 1.67 | -1.06 | tRNA modification / tRNA processing / protein homotetramerization                                     |
| Rhot2       | 1.58 | 1.88 | -1.19 | cellular homeostasis / mitochondrion transport along microtubule                                      |
| Gm16503     | 1.57 | 1.53 | 1.02  | ---                                                                                                   |
| Enkd1       | 1.57 | 1.66 | -1.06 | ---                                                                                                   |
| Tm2d1       | 1.57 | 1.65 | -1.06 | Apoptotic process / G-protein coupled receptor signaling pathway                                      |
| Ramp3       | 1.57 | 1.5  | 1.05  | Calcium ion transport / intracellular protein transport / signal transduction                         |
| Are1l       | 1.57 | 1.69 | -1.08 | Negative regulation of apoptotic process / Protein ubiquitination                                     |
| Gm12689     | 1.56 | 1.62 | -1.04 | ---                                                                                                   |
| Sval1       | 1.55 | 1.54 | 1.01  | ---                                                                                                   |
| Sae1        | 1.55 | 1.62 | -1.05 | Cellular protein modification process / protein sumoylation / regulation of mitotic cell cycle        |
| Gm14525     | 1.55 | 1.66 | -1.07 | ---                                                                                                   |
| Trim21      | 1.55 | 1.58 | 1.12  | Regulation of Innate immune response / positive regulation of cell cycle / protein polyubiquitination |
| Klc1        | 1.55 | 1.6  | -1.03 | Intracellular protein transport / microtubule-based movement                                          |
| Wdr27       | 1.55 | 1.5  | 1.03  | Protein-protein interaction / cell signaling                                                          |

|         |      |      |       |                                                                                                         |
|---------|------|------|-------|---------------------------------------------------------------------------------------------------------|
| Kcnd1   | 1.54 | 1.74 | -1.13 | Transport / ion transport / potassium ion transport / regulation of ion transmembrane transport         |
| Mtrf1   | 1.54 | 1.61 | -1.04 | Translational termination / Nucleotide binding and translation release factor activity                  |
| Dolk    | 1.53 | 1.69 | -1.11 | Phosphorylation / dolichyl monophosphate biosynthetic process                                           |
| Rragd   | 1.53 | 1.59 | -1.04 | RET signaling / Translational Control                                                                   |
| Abcb1a  | 1.53 | 2.04 | -1.34 | G2/M transition of mitotic cell cycle / ATP catabolic process / drug transmembrane transport            |
| Gpn3    | 1.53 | 1.53 | 1     | Nucleotide binding / hydrolase activity                                                                 |
| Tfpt    | 1.53 | 1.69 | -1.1  | DNA repair / apoptotic process / DNA recombination / regulation of transcription. DNA-templated         |
| Hnrnpu  | 1.52 | 1.7  | -1.12 | mRNA processing / RNA splicing / osteoblast differentiation                                             |
| Itch    | 1.52 | 1.65 | -1.09 | Negative regulation of apoptotic process / Immune system process / positive regulation of T cell anergy |
| Slc30a7 | 1.52 | 1.53 | -1.01 | Transport / transmembrane transport / ion transport / cation transport / zinc ion transport             |
| Slc17a5 | 1.52 | 1.61 | -1.06 | Transport / amino acid transport / sialic acid transport / ion transmembrane transport                  |
| Jak3    | 1.52 | 1.61 | -1.06 | Negative regulation of cytokine production / regulation of cytosolic calcium concentration              |
| Dhx16   | 1.52 | 1.61 | -1.06 | ATP catabolic process                                                                                   |
| Ifi44   | 1.51 | 1.95 | -1.29 | Heart Block. Congenital                                                                                 |
| Vps13d  | 1.51 | 1.5  | 1.01  | Choreoacanthocytosis                                                                                    |
| Wdr54   | 1.51 | 1.58 | -1.05 | ---                                                                                                     |
| Ctdnep1 | 1.51 | 1.7  | -1.13 | Positive regulation of canonical Wnt signaling pathway / protein dephosphorylation                      |
| Cd68    | 1.51 | 1.9  | -1.26 | Cellular response to organic substance                                                                  |
| Drg1    | 1.51 | 1.62 | -1.07 | Ferrous iron transport                                                                                  |
| Ak2     | 1.5  | 1.65 | -1.1  | ADP biosynthetic process / phosphorylation / AMP metabolic process                                      |
| Tceanc2 | 1.5  | 2.23 | -1.49 | Transcription. DNA-templated                                                                            |
| Huwe1   | 1.5  | 1.61 | -1.07 | Protein ubiquitination / DNA repair / cellular response to DNA damage stimulus                          |
| Xpo1    | 1.5  | 2.23 | -1.49 | Negative regulation of transcription from RNA polymerase II promoter / protein export from nucleus      |
| March6  | 1.5  | 1.64 | -1.09 | Protein K48-linked ubiquitination                                                                       |
| Pla2g7  | 1.5  | 1.58 | -1.05 | Regulation of monocyte chemotaxis /inflammatory response/calcium-independent phospholipase activity     |
| Tm9sf3  | 1.5  | 1.87 | -1.25 | Assembly and activity of V-ATPase                                                                       |
